# Supplementary material
Source: Springer Nature journal article supplement (https://www.springermedizin.de/resource/supplementary/12985_2010_1268_MOESM4_ESM.pdf/9609448)

**Time (hrs)**

**UT**

**12**

**24**

**48**

**72**

**Huh7**

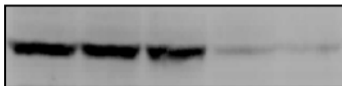

**Phospho-MEK**

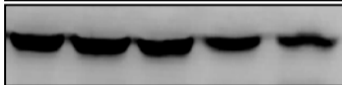

**MEK**

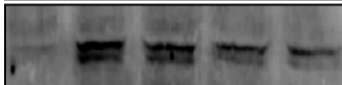

**Phospho-STAT1**

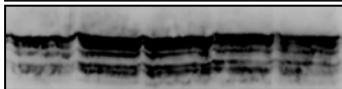

**STAT1**

Supplement: MOESM4 [file 9609448]
